# Supplementary material for: The Role of Immunohistochemical Analysis as a Tool for the Diagnosis, Prognostic Evaluation and Treatment of Prostate Cancer: A Systematic Review of the Literature
Source: Front Oncol. 2018 Sep 18;8:377. doi: 10.3389/fonc.2018.00377 (PMC6153326; doi:10.3389/fonc.2018.00377)
Supplement: Supplementary file 1 [file Table_1.xlsx]

## Sheet: Planilha1
Supplementary Table 1 - Studies characteristics: Analyzed proteins, material sampling and tumor staging.
Authors	Year	Journal	Title	Analyzed proteins	Material	Tumor staging
Udager AM, et al	2016	Prostate.	Concurrent nuclear ERG and MYC protein overexpression defines a subset of locally advanced prostate cancer: Potential opportunities for synergistic targeted therapeutics	myc, erg	Prostatectomy specimens	Localized and locally advanced
Chevrier M, et al.	2017	BMC Cancer	Expression of SOCS1 and the downstream targets of its putative tumor suppressor functions in prostate cancer.	SOCS1, P53, MET, P22, KI67	Prostatectomy specimens	Localized and locally advanced
Inoue T, et al	2005	Urology	Androgen receptor, Ki67, and p53 expression in radical prostatectomy specimens predict treatment failure in Japanese population.	Ki67, p53, and androgen receptor antigen expression	Prostatectomy specimens	Localized and locally advanced
Zellweger T, et al	2005	Int J Cancer	Expression patterns of potential therapeutic targets in prostate cancer.	Bcl-2, p53, ILK, Syndecan-1, MUC-1, EGFR, HER2/neu, HSP-90, Ep-CAM, MMP-2, CD-10, CD-117 and Ki67	Transurethral resection, prostatectomy and surgical resection of metastatic lesions	Localized and locally advanced
Zellweger T, et al	2003	Prostate.	Tissue microarray analysis reveals prognostic significance of syndecan-1 expression in prostate cancer	Ki67, Bcl-2, p53, CD-10 (neutral endopeptidase), and syndecan-1 (CD-138)	Transurethral resections and prostatectomy specimens	Localized and locally advanced
Zellweger T, et al	2009	Int J Cancer	Tumour growth fraction measured by immunohistochemical staining of Ki67 is an independent prognostic factor in preoperative prostate biopsies with small-volume or low-grade prostate cancer.	Ki67, Bcl-2 and p54	Biopsy and prostatectomy specimens	Localized and locally advanced
Nagao K, et al	2011	Jpn J Clin Oncol.	Ki67 and BUBR1 may discriminate clinically insignificant prostate cancer in the PSA range &lt;4 ng/ml.	Ki67, p53, bcl-2, BUBR1, PTEN e E-cadherin	Biopsy	Localized and locally advanced
Bubendorf L, et al	1998	Hum Pathol.	Ki67 labeling index in core needle biopsies independently predicts tumor-specific survival in prostate cancer.	Ki67, p53 and Bcl-2	Biopsy	Localized and locally advanced
Bubendorf L, et al	1996	Am J Pathol	Prognostic significance of Bcl-2 in clinically localized prostate cancer	KI67, Bcl-2 e p53	Prostatectomy specimens	Localized and locally advanced
Osman I, et al	1999	Clin Cancer Res	Inactivation of the p53 pathway in prostate cancer: impact on tumor progression.	p53, mdm2, and p21/WAF2	Prostatectomy specimens	Localized and locally advanced
Hagen RM et al	2014	Am J Clin Pathol.	Quantitative analysis of ERG expression and its splice isoforms in formalin-fixed, paraffin-embedded prostate cancer samples: association with seminal vesicle invasion and biochemical recurrence	ERG	Prostatectomy specimens	Localized and locally advanced
Font-Tello A, et al	2015	Prostate	Association of ERG and TMPRSS2-ERG with grade, stage, and prognosis of prostate cancer is dependent on their expression levels.	ERG	Prostatectomy and cystoprostatectomy specimens	Localized and locally advanced
Kim SH, et al	2015	PLoS One.	Overexpression of ERG and Wild-Type PTEN Are Associated with Favorable Clinical Prognosis and Low Biochemical Recurrence in Prostate Cancer.	ERG, PTEN	Prostatectomy specimens	Localized and locally advanced
Taris M et al	2014	Prostate.	ERG expression in prostate cancer: the prognostic paradox.	ERG	Prostatectomy specimens	Localized and locally advanced
Nishijima J, et al	2015	Neoplasma.	Clinical significance of ERG rearrangement subtype and its association with increased p53 expression in Japanese and German prostate cancer.	ERG p53	Prostatectomy specimens	Localized and locally advanced
Suh J H et al	2012	Korean J Pathol.	ERG immunohistochemistry and clinicopathologic characteristics in Korean prostate adenocarcinoma patients	ERG	Prostatectomy specimens	Localized and locally advanced
Kron K et al	2012	Clin Cancer Res.	Correlation of ERG expression and DNA methylation biomarkers with adverse clinicopathologic features of prostate cancer.	ERG	Prostatectomy specimens	Localized and locally advanced
Szász AM et al	2013	Int Urol Nephrol.	Prognostic potential of ERG (ETS-related gene) expression in prostatic adenocarcinoma.	ERG, claudin-4, claudin-5, beta-catenin	Transurethral resection and prostatectomy specimens	Localized and locally advanced
Schaefer G et al	2013	Prostate Cancer Prostatic Dis.	Distinct ERG rearrangement prevalence in prostate cancer: higher frequency in young age and in low PSA prostate cancer	ERG	Prostatectomy specimens	Localized and locally advanced
Brooks JD, et al	2015	PLoS One.	Evaluation of ERG and SPINK1 by Immunohistochemical Staining and Clinicopathological Outcomes in a Multi-Institutional Radical Prostatectomy Cohort of 1067 Patients.	ERG SPINK1	Prostatectomy specimens	Localized and locally advanced
Xu B et al	2014	Hum Pathol.	The prognostic role of ERG immunopositivity in prostatic acinar adenocarcinoma: a study including 454 cases and review of the literature.	ERG	Prostatectomy specimens	Localized and locally advanced
Hoogland AM et al	2012	Mod Pathol.	ERG immunohistochemistry is not predictive for PSA recurrence, local recurrence or overall survival after radical prostatectomy for prostate cancer.	ERG	Prostatectomy specimens	Localized and locally advanced
Weinmann S et al	2013	Prostate.	Immunohistochemical expression of ERG in the molecular epidemiology of fatal prostate cancer study	ERG	Prostatectomy specimens	Localized and locally advanced
Graff RE, et al	2016	Br J Cancer.	Pre-diagnostic circulating sex hormone levels and risk of prostate cancer by ERG tumour protein expression.	ERG	Transurethral resection and prostatectomy specimens	Localized and locally advanced
Leinonen KA et al	2013	Cancer Epidemiol Biomarkers Prev.	Loss of PTEN is associated with aggressive behavior in ERG-positive prostate cancer	ERG, AR, PTEN, SPINK1, Ki-67 and EZH2	Biopsy, transurethral resection, prostatectomy and surgical resection of metastatic lesions	Localized and locally advanced
Aldaoud N, et al	2017	Virchows Arch	Prostate cancer in Jordanian-Arab population: ERG status and relationship with clinicopathologic characteristics.	ERG	Biopsy, transurethral resection, prostatectomy and enucleation specimens	Localized and locally advanced
Silva MP, et al	2016	Transl Oncol.	Cancer Prognosis Defined by the Combined Analysis of 8q, PTEN and ERG.	PTEN, ERG, 8q	Prostatectomy specimens	Localized and locally advanced
Lotan TL, et al	2016	Eur Urol Focus	PTEN Loss as Determined by Clinical-grade Immunohistochemistry Assay Is Associated with Worse Recurrence-free Survival in Prostate Cancer	PTEN, ERG	Prostatectomy specimens	Localized and locally advanced
Tosoian JJ, et al	2017	Eur Urol.	Prevalence and Prognostic Significance of PTEN Loss in African-American and European-American Men Undergoing Radical Prostatectomy.	PTEN, ERG	Prostatectomy specimens	Localized and locally advanced
Halvorsen OJ, et al	2003	Clin Cancer Res.	Combined loss of PTEN and p27 expression is associated with tumor cell proliferation by Ki-67 and increased risk of recurrent disease in localized prostate cancer.	PTEN, p27, Ki-67	Prostatectomy specimens	Localized
Lahdensuo K, et al	2016	Mod Pathol.	Loss of PTEN expression in ERG-negative prostate cancer predicts secondary therapies and leads to shorter disease-specific survival time after radical prostatectomy	PTEN, ERG	Prostatectomy specimens	Localized and locally advanced
Ahearn TU, et al	2016	J Natl Cancer Inst.	A Prospective Investigation of PTEN Loss and ERG Expression in Lethal Prostate Cancer	PTEN, ERG	Transurethral resection and prostatectomy specimens	Localized and locally advanced
Lotan TL, et al	2011	Clin Cancer Res	PTEN protein loss by immunostaining: analytic validation and prognostic indicator for a high risk surgical cohort of prostate cancer patients	PTEN	Prostatectomy specimens and surgical resection of metastatic lesions	Localized and locally advanced
Jiang FN, et al	2013	PLoS One.	An integrative proteomics and interaction network-based classifier for prostate cancer diagnosis.	PTEN, SFPQ and HDAC1	Transurethral resection and prostatectomy specimens	Localized and locally advanced
Murphy SJ, et al	2016	Mod Pathol.	Integrated analysis of the genomic instability of PTEN in clinically insignificant and significant prostate cancer.	PTEN	Prostatectomy specimens	Localized and locally advanced
Guedes LB, et al	2017	J Urol.	PTEN Loss in Gleason Score 3 + 4 = 7 Prostate Biopsies is Associated with Nonorgan Confined Disease at Radical Prostatectomy.	PTEN	Biopsy and prostatectomy specimens	Localized and locally advanced
Fontugne J, et al	2014	Cancer Epidemiol Biomarkers Prev.	Recurrent prostate cancer genomic alterations predict response to brachytherapy treatment.	PTEN, ERG	Biopsy	Localized and locally advanced
Lotan TL, et al	2015	Mod Pathol.	PTEN loss is associated with upgrading of prostate cancer from biopsy to radical prostatectomy	PTEN	Biopsy and prostatectomy specimens	Localized and locally advanced
Shah RB, et al	2015	Hum Pathol.	Heterogeneity of PTEN and ERG expression in prostate cancer on core needle biopsies: implications for cancer risk stratification and biomarker sampling	PTEN, ERG	Biopsy	Data not available
Cuzick J, et al	2013	Br J Cancer.	Prognostic value of PTEN loss in men with conservatively managed localised prostate cancer	PTEN	Transurethral resection	Localized
Prowatke I, et al	2007	Br J Cancer	Expression analysis of imbalanced genes in prostate carcinoma using tissue microarrays	FASN, BARK1, PP1alfa, PP2A, NM23-H1, MYC	Prostatectomy specimens	Localized and locally advanced
Zeng W, et al	2015	Int J Clin Exp Pathol	Nuclear C-MYC expression level is associated with disease progression and potentially predictive of two year overall survival in prostate cancer.	C-MYC	Biopsy and prostatectomy specimens	Locally advanced
